# Supplementary material for: Nitro and amino BODIPYS: crucial substituents to modulate their photonic behavior
Source: Royal Society of Chemistry journal article supplement (doi:10.1039/c2ra22916a), 2012-11-21
Supplement: c2ra22916a.pdf [file c2ra22916a.pdf]

## Electronic Supplementary Information

### **Nitro and amino BODIPYS: Crucial substituents to modulate their photonic behavior**

Ixone Esnal,<sup>a</sup> Jorge Bañuelos,<sup>a\*</sup> Iñigo López Arbeloa,<sup>a</sup> Angel Costela,<sup>b</sup> Inmaculada Garcia-Moreno,<sup>b</sup> Miguel Garzón,<sup>c</sup> Antonia R. Agarrabeitia,<sup>c</sup> María José Ortiz<sup>c</sup>

<sup>a</sup> Departamento de Química Física, Universidad País Vasco (UPV-EHU), Apto. 644, 48080, Bilbao, Spain.

<sup>b</sup> Departamento de Sistemas de Baja Dimensionalidad, Superficies y Materia Condensada, Instituto Química-Física “Rocasolano”, CSIC, Serrano 119, 28006 Madrid, Spain.

<sup>c</sup> Departamento de Química Orgánica I, Facultad de Ciencias Químicas, Universidad Complutense, 28040, Madrid, Spain.

| <b>Table of Contents</b>                                                                                                  | <b>Page</b> |
|---------------------------------------------------------------------------------------------------------------------------|-------------|
| Nitration of BODIPYs                                                                                                      | S3          |
| Reduction of BODIPYs                                                                                                      | S3          |
| Reactions of BODIPYs with HNO <sub>3</sub> /Ac <sub>2</sub> O                                                             | S3          |
| Nitration of BODIPY <b>1</b>                                                                                              | S3          |
| Nitration of BODIPY <b>2</b>                                                                                              | S4          |
| Independent synthesis of 2-ethyl-4,4-difluoro-1,3,8-trimethyl-6-nitro-4-bora-3a,4a-diaza- <i>s</i> -indacene ( <b>3</b> ) | S4          |
| Nitration of (1 <i>H</i> -pyrrol-2-yl) (4-tolyl) methanone ( <b>11</b> )                                                  | S5          |
| Independent synthesis of 4,4-difluoro-2-nitro-8-(4-tolyl)-4-bora-3a,4a-diaza- <i>s</i> -indacene ( <b>5</b> )             | S5          |
| Synthesis of 5-amino-2-ethyl-4,4-difluoro-1,3,8-trimethyl-4-bora-3a,4a-diaza- <i>s</i> -indacene ( <b>7</b> )             | S6          |
| Synthesis of 3-amino-4,4-difluoro-8-(4-tolyl)-4-bora-3a,4a-diaza- <i>s</i> -indacene ( <b>8</b> )                         | S6          |
| <sup>1</sup> H NMR and <sup>13</sup> C NMR spectra compounds                                                              | S7-S22      |
| Table S1-S3. Photophysical data                                                                                           | S23-S25     |
| Scheme S1. Tautomeric equilibrium                                                                                         | S26         |
| Figure S1-S2. Absorption spectra                                                                                          | S27         |

BODIPY dyes **1**<sup>1</sup> and **2**<sup>2</sup> were synthesized by the methods previously described.

### General procedure for the nitration reactions

To a stirred solution of BODIPY (1 equiv) in Ac<sub>2</sub>O was added HNO<sub>3</sub> (2-4 equiv) at 0 °C under an argon atmosphere. The mixture was stirred for 10-30 min and after that time, the solvent was removed under reduced pressure. The products were purified by flash chromatography on silica gel (eluent hexane/EtOAc).

### General procedure for the reduction reactions

A solution of the corresponding nitro-BODIPY in EtOAc was hydrogenated in an H-Cube continuous flow reactor with a flow rate of 1.0 mL/min, full pressure of hydrogen, at 40 °C, and using a 10% Pd/C CatCart™ cartridge. The solvent was removed under reduced pressure and the product was obtained in quantitative yield

### Reactions of BODIPYs 1-2 with HNO<sub>3</sub>/Ac<sub>2</sub>O

**Nitration of BODIPY 1.** According to general procedure, BODIPY **1** (100 mg, 0.33 mmol), HNO<sub>3</sub> (0.03 mL, 0.66 mmol) in Ac<sub>2</sub>O (15 mL) for 10 min were reacted. Flash chromatography using hexane/EtOAc (8:2) afforded, by order of elution, 2-ethyl-4,4-difluoro-1,3,8-trimethyl-6-nitro-4-bora-3a,4a-diaza-*s*-indacene (**3**) (11 mg, 11%) as a yellow solid and 2-ethyl-4,4-difluoro-1,3,8-trimethyl-5-nitro-4-bora-3a,4a-diaza-*s*-indacene (**4**) (37 mg, 37%) as a yellow solid.

**Compound 3:** m.p. 238.0-239.0 °C; <sup>1</sup>H NMR (300 MHz, CDCl<sub>3</sub>): δ 8.01 (1 H, s, H-5), 7.30 (1 H, s, H-7), 2.57 (3 H, s, CH<sub>3</sub>-C3), 2.52 (3 H, s, CH<sub>3</sub>-C8), 2.40 (2 H, q, *J* = 7.5 Hz, CH<sub>2</sub>), 2.33 (3 H, s, CH<sub>3</sub>-C1), 1.03 (3 H, t, *J* = 7.5 Hz, CH<sub>3</sub>CH<sub>2</sub>); <sup>13</sup>C NMR (75 MHz, CDCl<sub>3</sub>): δ 168.2 (C), 143.5 (C), 140.2 (C), 139.1 (C), 138.6 (C), 137.4 (C), 132.2 (C), 130.9 (CH), 113.6 (CH), 17.1 (CH<sub>2</sub>), 16.1 (CH<sub>3</sub>), 14.4 (CH<sub>3</sub>), 14.1 (CH<sub>3</sub>), 13.8 (CH<sub>3</sub>); IR (neat): 1596, 1505, 1367, 1298, 1086, 979, 757 cm<sup>-1</sup>; HRMS-ESI<sup>+</sup>: calcd for (C<sub>14</sub>H<sub>16</sub>BF<sub>2</sub>N<sub>3</sub>O<sub>2</sub>+H<sup>+</sup>) 308.1376 found 308.1385.

**Compound 4:** m.p. 166.9-168.0 °C; <sup>1</sup>H NMR (700 MHz, CDCl<sub>3</sub>): δ 7.10 (1 H, d, *J* = 4.2 Hz, H-6), 6.77 (1 H, d, *J* = 4.9 Hz, H-7), 2.62 (3 H, s, CH<sub>3</sub>-C3), 2.53 (3 H, s, CH<sub>3</sub>-C8), 2.40 (2 H, q, *J* = 7.7 Hz, CH<sub>2</sub>), 2.32 (3 H, s, CH<sub>3</sub>-C1), 1.03 (3 H, t, *J* = 7.7 Hz,

<sup>1</sup> J. Bañuelos Prieto, A. R. Agarrabeitia, I. Garcia-Moreno, I. López Arbeloa, A. Costela, L. Infantes, M. E. Pérez-Ojeda, M. Palacios Cuesta, M. J. Ortiz, *Chem. Eur. J.* **2010**, *16*, 14094-14105.

<sup>2</sup> A. Cui, X. Peng, J. Fan, X. Chen, Y. Wu, B. Guo *J. Photochem. Photobiol. A* **2007**, *186*, 85-92.

CH<sub>3</sub>CH<sub>2</sub>); <sup>13</sup>C NMR (176 MHz, CDCl<sub>3</sub>): δ 170.1 (C), 147.2 (C), 143.2 (C), 139.8 (C), 138.2 (C), 137.8 (C), 135.2 (C), 117.7 (CH), 114.6 (CH), 17.2 (CH<sub>2</sub>), 15.9 (CH<sub>3</sub>), 14.4 (CH<sub>3</sub>), 14.1 (CH<sub>3</sub>), 14.0 (CH<sub>3</sub>); IR (neat): 1604, 1296, 1160, 1119, 1018, 750 cm<sup>-1</sup>; HRMS-ESI<sup>+</sup>: calcd for (C<sub>14</sub>H<sub>16</sub>BF<sub>2</sub>N<sub>3</sub>O<sub>2</sub>+H<sup>+</sup>) 308.1376 found 308.1384.

**Nitration of BODIPY 2.** According to general procedure, BODIPY **2** (100 mg, 0.35 mmol), HNO<sub>3</sub> (0.06 mL, 1.4 mmol) in Ac<sub>2</sub>O (15 mL) for 10 min were reacted. Flash chromatography using hexane/EtOAc (8:2) afforded, by order of elution, 4,4-difluoro-2-nitro-8-(4-tolyl)-4-bora-3a,4a-diaza-*s*-indacene (**5**) (7 mg, 6%) as a yellow solid and 4,4-difluoro-3-nitro-8-(4-tolyl)-4-bora-3a,4a-diaza-*s*-indacene (**6**) (41 mg, 36%) as a yellow solid.

**Compound 5:** <sup>1</sup>H NMR (700 MHz, CDCl<sub>3</sub>): δ 8.28 (1 H, s, H-3), 8.17 (1 H, s, H-5), 7.42 (2 H, d, *J* = 8.4 Hz, H-2'), 7.34 (2 H, d, *J* = 8.4 Hz, H-3'), 7.27 (1 H, s, H-1), 7.17 (1 H, d, *J* = 4.9 Hz, H-7), 6.71 (1 H, d, *J* = 4.9 Hz, H-6), 2.44 (3 H, s, CH<sub>3</sub>); <sup>13</sup>C NMR (176 MHz, CDCl<sub>3</sub>): δ 151.2 (CH), 150.0 (C), 143.1 (C), 141.7 (C), 137.6 (C), 136.1 (CH), 135.2 (CH), 131.9 (C), 130.7 (2 CH), 129.8 (2 CH), 129.7 (C), 122.3 (CH), 122.0 (CH), 21.6 (CH<sub>3</sub>); IR (neat): 1590, 1298, 1108, 1051, 756 cm<sup>-1</sup>; HRMS-ESI<sup>-</sup>: calcd for (C<sub>16</sub>H<sub>12</sub>BF<sub>2</sub>N<sub>3</sub>O<sub>2</sub>) 327.0996 found 327.1013.

**Compound 6:** m.p. 192.5-193.0 °C; <sup>1</sup>H NMR (300 MHz, CDCl<sub>3</sub>): δ 8.23 (1 H, s, H-5), 7.38 (2 H, d, *J* = 8.1 Hz, H-2'), 7.31 (2 H, d, *J* = 8.1 Hz, H-3'), 7.14 (1 H, d, *J* = 4.5 Hz, H-2), 7.10 (1 H, d, *J* = 4.5 Hz, H-7), 6.73 (1 H, dd, *J* = 4.5 and 1.2 Hz, H-6), 6.71 (1 H, d, *J* = 4.5 Hz, H-1), 2.43 (3 H, s, CH<sub>3</sub>); <sup>13</sup>C NMR (176 MHz, CDCl<sub>3</sub>): δ 152.0 (CH), 149.5 (C), 148.4 (C), 141.6 (C), 136.7 (C), 135.1 (CH), 133.4 (C), 129.8 (2 CH), 128.8 (C), 128.6 (2 CH), 125.5 (CH), 122.5 (CH), 113.8 (CH), 20.5 (CH<sub>3</sub>); IR (neat): 1600, 1498, 1278, 1100, 990, 759 cm<sup>-1</sup>; HRMS-ESI<sup>-</sup>: calcd for (C<sub>16</sub>H<sub>12</sub>BF<sub>2</sub>N<sub>3</sub>O<sub>2</sub>) 327.0996 found 327.1022.

### **Independent synthesis of 2-ethyl-4,4-difluoro-1,3,8-trimethyl-6-nitro-4-bora-3a,4a-diaza-*s*-indacene (**3**).**

To a solution of 2-acetyl-4-nitro-1*H*-pyrrole<sup>3</sup> (**10**) (500 mg, 3.25 mmol) in CHCl<sub>3</sub> (10 mL) was added POCl<sub>3</sub> (1.5 mL, 16.25 mmol), and the mixture was stirred for 30 min at rt. Then, 3-ethyl-2,4-dimethyl-1*H*-pyrrole (0.44 mL, 3.25 mmol) in CHCl<sub>3</sub> (5 mL) was

<sup>3</sup> H. Oda, T. Hanami, T. Iwashita, M. Kojima, M. Itoh, Y. Hayashizaki, *Tetrahedron*, **2007**, *63*, 12747-12753.

added and the resulting solution was stirred for 12 h at rt. Triethylamine (0.5 mL, 3.25 mmol) was added, followed by an addition of  $\text{BF}_3 \cdot \text{Et}_2\text{O}$  (0.4 mL, 3.25 mmol), and stirring was continued for 3 h before being quenched with 10% aqueous HCl and extracted with  $\text{CH}_2\text{Cl}_2$ . The organic extracts were washed with  $\text{H}_2\text{O}$ , dried over  $\text{MgSO}_4$ , filtered and evaporated to dryness. Flash chromatography using hexane/EtOAc (8:2) afforded **3** (200 mg, 24%).

**Nitration of (1*H*-pyrrol-2-yl) (4-tolyl) methanone (11).** According to general procedure, compound **11**<sup>4</sup> (200 mg, 1.17 mmol),  $\text{HNO}_3$  (0.1 mL, 2.2 mmol) in  $\text{Ac}_2\text{O}$  (5 mL) for 30 min were reacted. Flash chromatography using hexane/EtOAc (95:5) afforded, by order of elution, (5-nitro-1*H*-pyrrol-2-yl) (4-tolyl) methanone (**12**) (82 mg, 32%) as a yellow solid and (4-nitro-1*H*-pyrrol-2-yl) (4-tolyl) methanone (**13**) (66 mg, 26%) as a yellow solid.

*Compound 12:*  $^1\text{H}$  NMR (300 MHz,  $\text{CDCl}_3$ ):  $\delta$  10.35 (NH), 7.76 (2 H, d,  $J = 8.1$  Hz, 4-tolyl), 7.27 (2 H, d,  $J = 8.1$  Hz, 4-tolyl), 7.07-7.05 (1 H, m, pyrrol), 6.80-6.79 (1 H, m, pyrrol), 2.40 (3 H, s,  $\text{CH}_3$ );  $^{13}\text{C}$  NMR (75 MHz,  $\text{C}_3\text{D}_6\text{O}$ ):  $\delta$  185.5 (CO), 152.4 (C), 144.7 (C), 138.1 (C), 135.6 (C), 130.2 (2 CH), 130.1 (2 CH), 118.1 (CH), 110.9 (CH), 21.6 ( $\text{CH}_3$ ); IR (neat): 3130, 1618, 1490, 1317, 1101, 790  $\text{cm}^{-1}$ ; HRMS-EI: calcd for ( $\text{C}_{12}\text{H}_{10}\text{N}_2\text{O}_3$ ) 230.0691 found 230.0687.

*Compound 13:*  $^1\text{H}$  NMR (300 MHz,  $\text{C}_3\text{D}_6\text{O}$ ):  $\delta$  12.02 (NH), 8.14-8.12 (1 H, m, pyrrol), 7.89 (2 H, d,  $J = 8.1$  Hz, 4-tolyl), 7.42 (2 H, d,  $J = 8.1$  Hz, 4-tolyl), 7.35-7.34 (1 H, m, pyrrol), 2.46 (3 H, s,  $\text{CH}_3$ );  $^{13}\text{C}$  NMR (75 MHz,  $\text{C}_3\text{D}_6\text{O}$ ):  $\delta$  185.0 (CO), 144.8 (C), 139.0 (C), 135.7 (C), 131.6 (C), 130.6 (2 CH), 130.3 (2 CH), 125.7 (CH), 112.8 (CH), 22.0 ( $\text{CH}_3$ ); IR (neat): 3138, 1615, 1502, 1327, 1112, 782  $\text{cm}^{-1}$ ; HRMS-EI: calcd for ( $\text{C}_{12}\text{H}_{10}\text{N}_2\text{O}_3$ ) 230.0691 found 230.0633.

### **Independent synthesis of 4,4-difluoro-2-nitro-8-(4-tolyl)-4-bora-3a,4a-diaza-s-indacene (5).**

To a solution of **12** (90 mg, 0.42 mmol) in  $\text{CHCl}_3$  (10 mL) was added  $\text{POCl}_3$  (0.1 mL, 1.08 mmol), and the mixture was stirred for 30 min at rt. Then, pyrrole (0.04 mL, 0.3 mmol) in  $\text{CHCl}_3$  (5 mL) was added and the resulting solution was stirred for 2 h at rt. Triethylamine (2 mL, 13 mmol) was added, followed by an addition of  $\text{BF}_3 \cdot \text{Et}_2\text{O}$  (2 mL, 13 mmol), and stirring was continued for 2 h before being quenched with 10% aqueous

<sup>4</sup> A. R. Katritzky, K. Suzuki, S. K. Singh, H.-Y. He, *J. Org. Chem.* **2003**, *68*, 5720-5723.

HCl and extracted with CH<sub>2</sub>Cl<sub>2</sub>. The organic extracts were washed with water, dried over MgSO<sub>4</sub>, filtered and evaporated to dryness. Flash chromatography using hexane/EtOAc (9:1) afforded **5** (6 mg, 6%).

**Synthesis of 5-amino-2-ethyl-4,4-difluoro-1,3,8-trimethyl-4-bora-3a,4a-diaza-s-indacene (7).** According to general procedure, BODIPY **4** (37 mg, 0.12 mmol) in EtOAc (25 mL) was hydrogenated, yielding **7** (33 mg, 99%) as an orange solid. m.p. 230.8-231.8 °C; <sup>1</sup>H NMR (700 MHz, C<sub>6</sub>D<sub>6</sub>): δ 6.61 (1 H, d, *J* = 2.1 Hz, H-7), 5.16 (1 H, d, *J* = 2.1 Hz, H-6), 4.51 (2 H, broad s, NH<sub>2</sub>), 2.66 (3 H, s, CH<sub>3</sub>), 2.23 (2 H, q, *J* = 7.7 Hz, CH<sub>2</sub>), 1.96 (3 H, s, CH<sub>3</sub>), 1.84 (3 H, s, CH<sub>3</sub>), 0.95 (3 H, t, *J* = 7.7 Hz, CH<sub>3</sub>CH<sub>2</sub>); <sup>13</sup>C NMR (176 MHz, C<sub>6</sub>D<sub>6</sub>): δ 158.1 (C-NH<sub>2</sub>), 144.8 (C), 132.0 (C), 131.3 (C), 129.7 (C), 129.5 (CH), 129.4 (C), 106.8 (CH), 17.2 (CH<sub>2</sub>), 15.7 (CH<sub>3</sub>), 15.3 (CH<sub>3</sub>), 12.7 (CH<sub>3</sub>), 12.1 (CH<sub>3</sub>); IR (neat): 3382, 1637, 1590, 1480, 1325, 1226, 1159, 772 cm<sup>-1</sup>; HRMS-ESI<sup>-</sup>: calcd for (C<sub>14</sub>H<sub>18</sub>BF<sub>2</sub>N<sub>3</sub>-H<sup>+</sup>) 276.1489 found 276.1498.

**Synthesis of 3-amino-4,4-difluoro-8-(4-tolyl)-4-bora-3a,4a-diaza-s-indacene (8).** According to general procedure, BODIPY **6** (23 mg, 0.07 mmol) in EtOAc (25 mL) was hydrogenated, yielding **8** (20 mg, 99%) as an orange solid. m.p. 192.0-193.0 °C; <sup>1</sup>H NMR (300 MHz, C<sub>6</sub>D<sub>6</sub>): δ 7.75 (1 H, broad s, H-5), 7.07 (2 H, d, *J* = 8.1 Hz, H-2'), 6.85 (2 H, d, *J* = 8.1 Hz, H-3'), 6.53 (1 H, d, *J* = 3.3 Hz, H-7), 6.46 (1 H, d, *J* = 4.8 Hz, H-1), 6.28 (1 H, dd, *J* = 3.3 and 2.4 Hz, H-6), 5.08 (1 H, d, *J* = 4.8 Hz, H-2), 4.77 (2 H, broad s, NH<sub>2</sub>), 2.06 (3 H, s, CH<sub>3</sub>); <sup>13</sup>C NMR (176 MHz, C<sub>6</sub>D<sub>6</sub>): δ 159.2 (C-NH<sub>2</sub>), 137.4 (C), 133.5 (CH), 133.3 (C), 131.7 (C), 131.5 (C), 131.0 (CH), 130.6 (C), 128.9 (2 CH), 127.3 (2 CH), 119.5 (CH), 112.4 (CH), 110.4 (CH), 19.5 (CH<sub>3</sub>); IR (neat): 3375, 1643, 1582, 1400, 1167, 1056, 741 cm<sup>-1</sup>; HRMS-ESI<sup>-</sup>: calcd for (C<sub>16</sub>H<sub>14</sub>BF<sub>2</sub>N<sub>3</sub>-H<sup>+</sup>) 296.1176 found 296.1187.

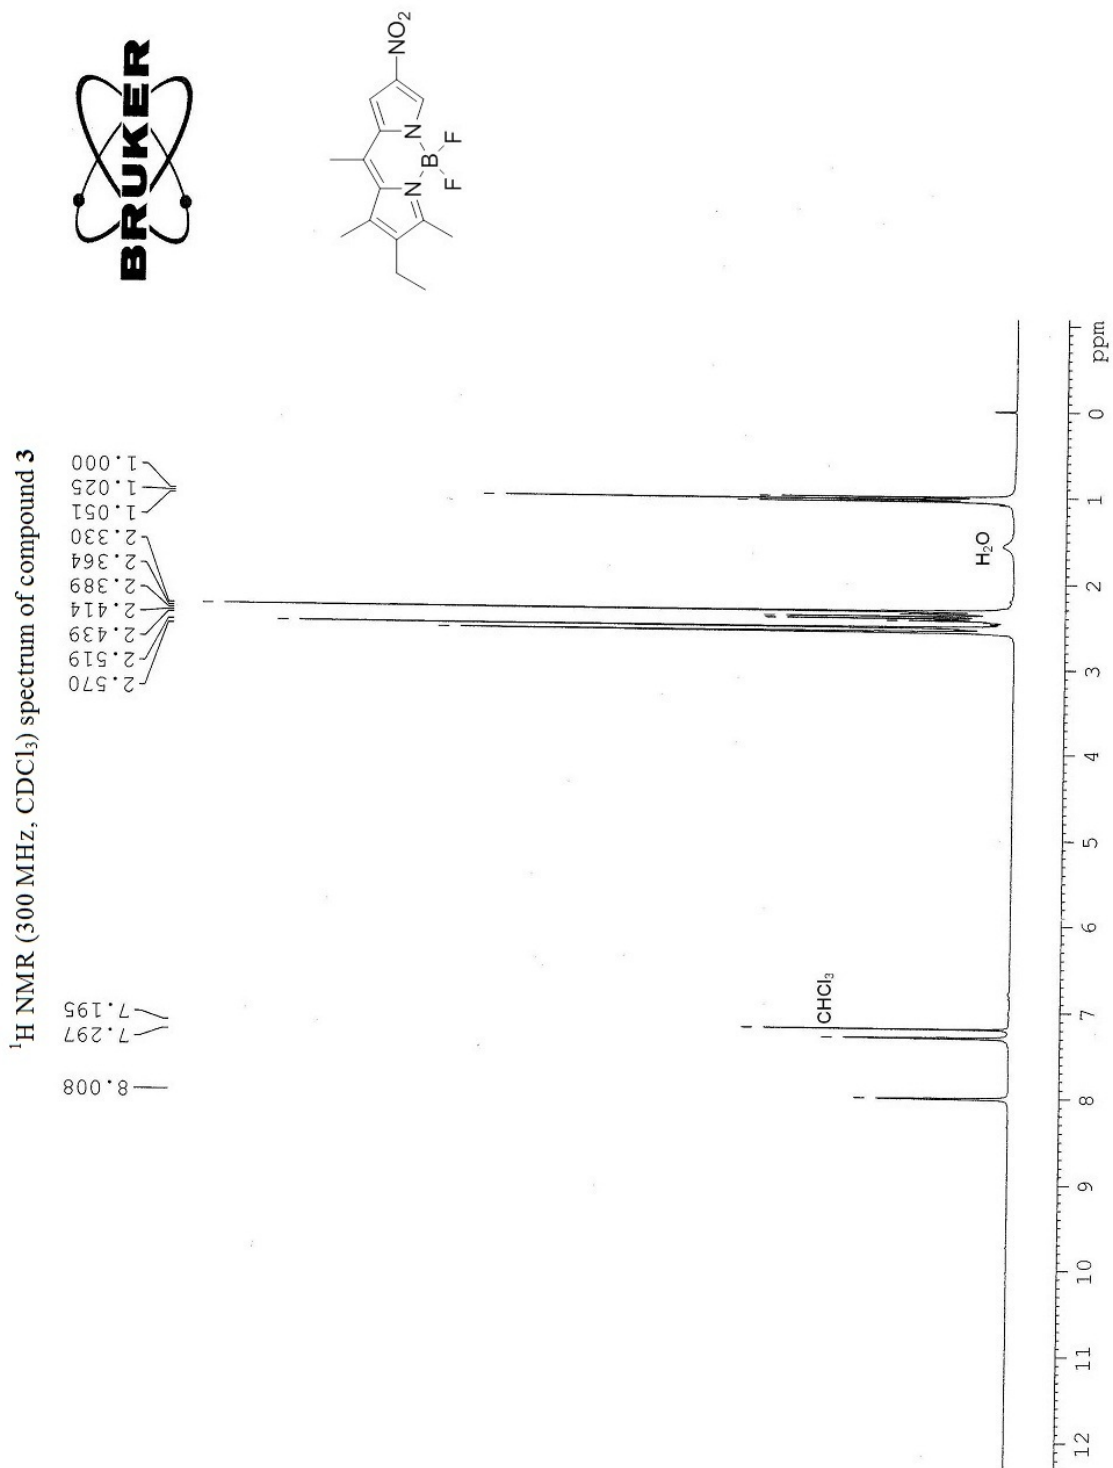

$^{13}\text{C}$  NMR (75 MHz,  $\text{CDCl}_3$ ) spectrum of compound **3**

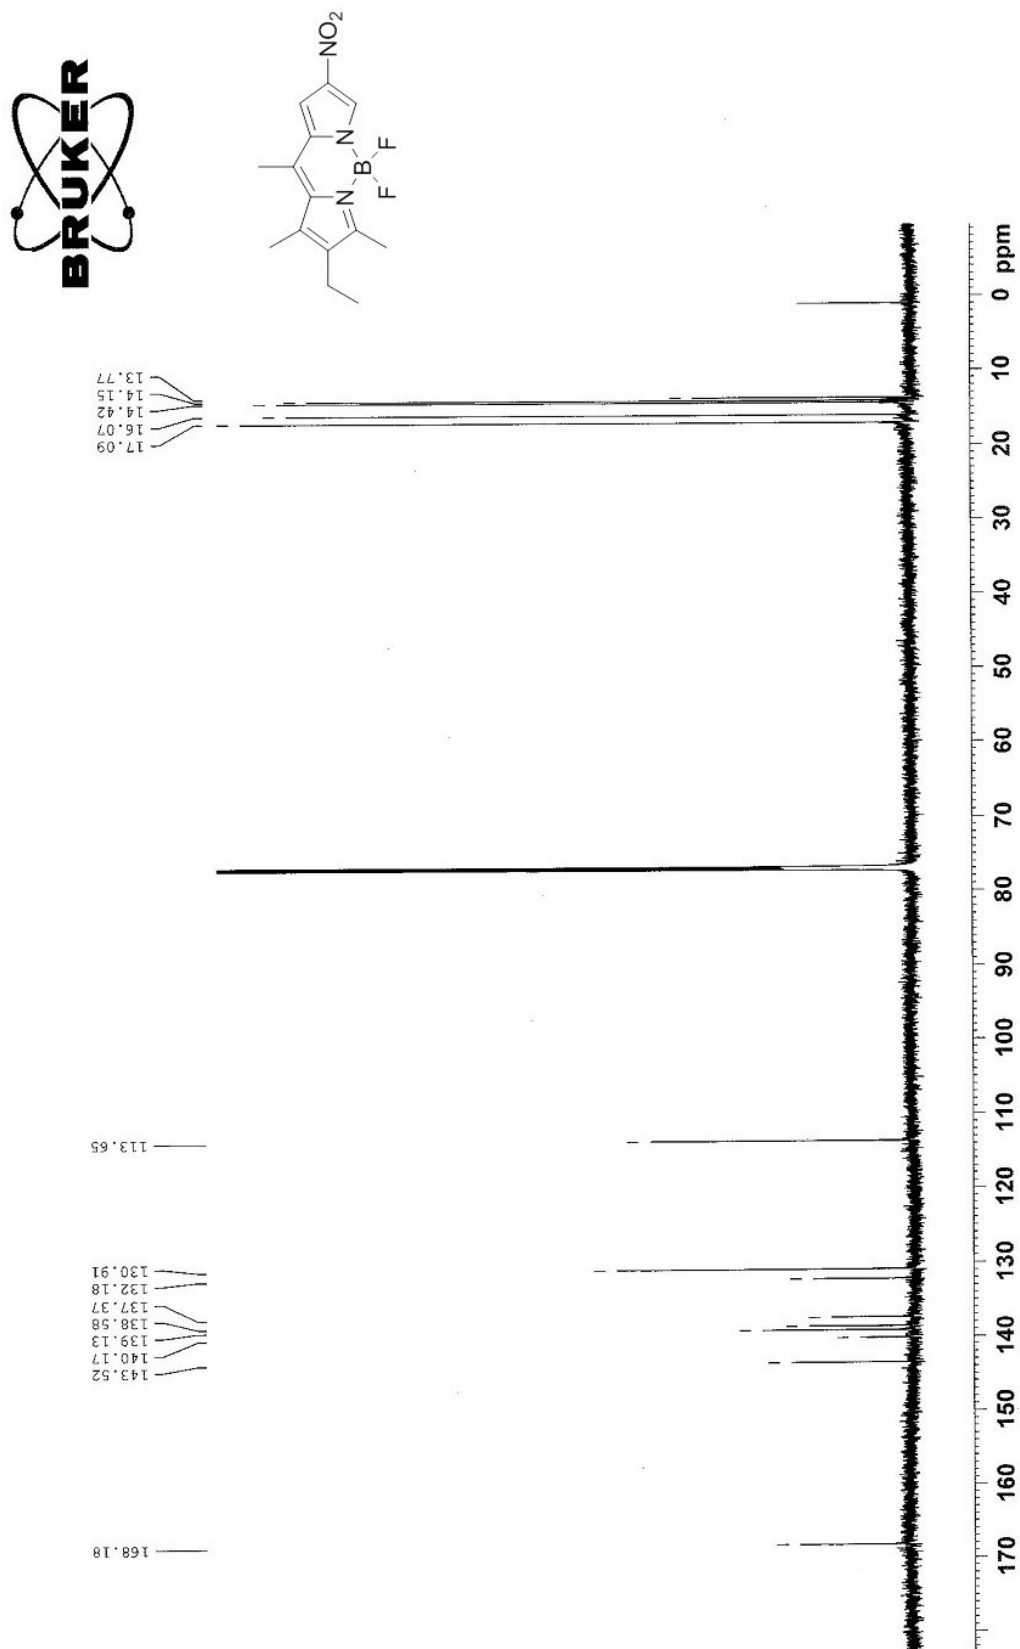



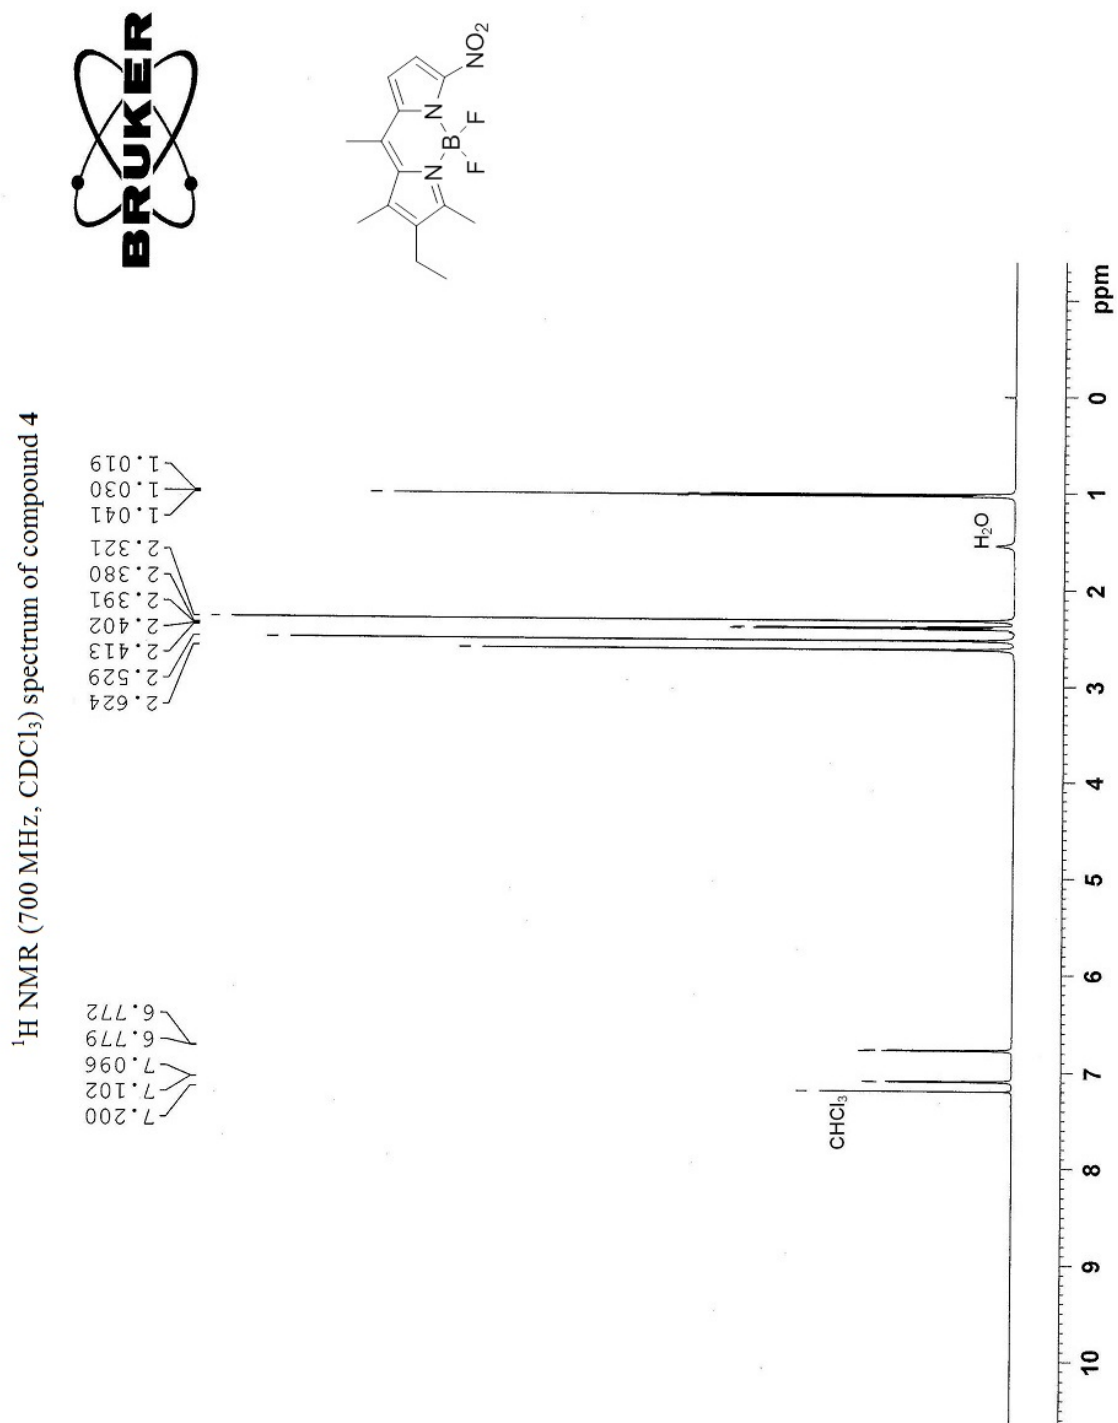

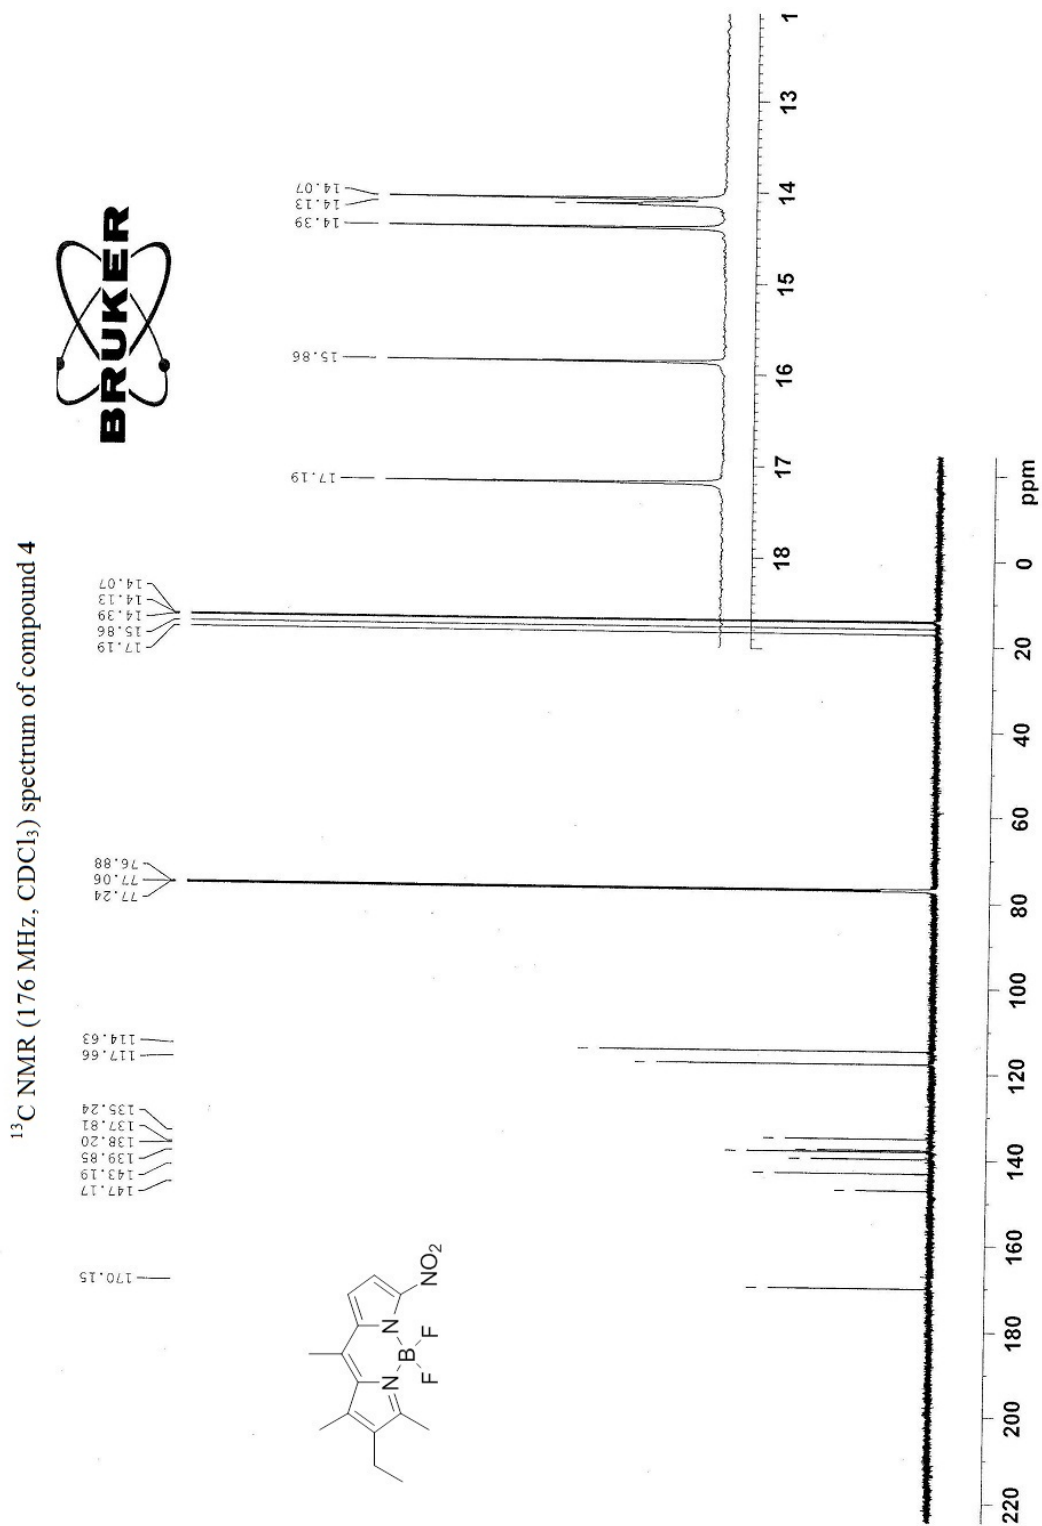



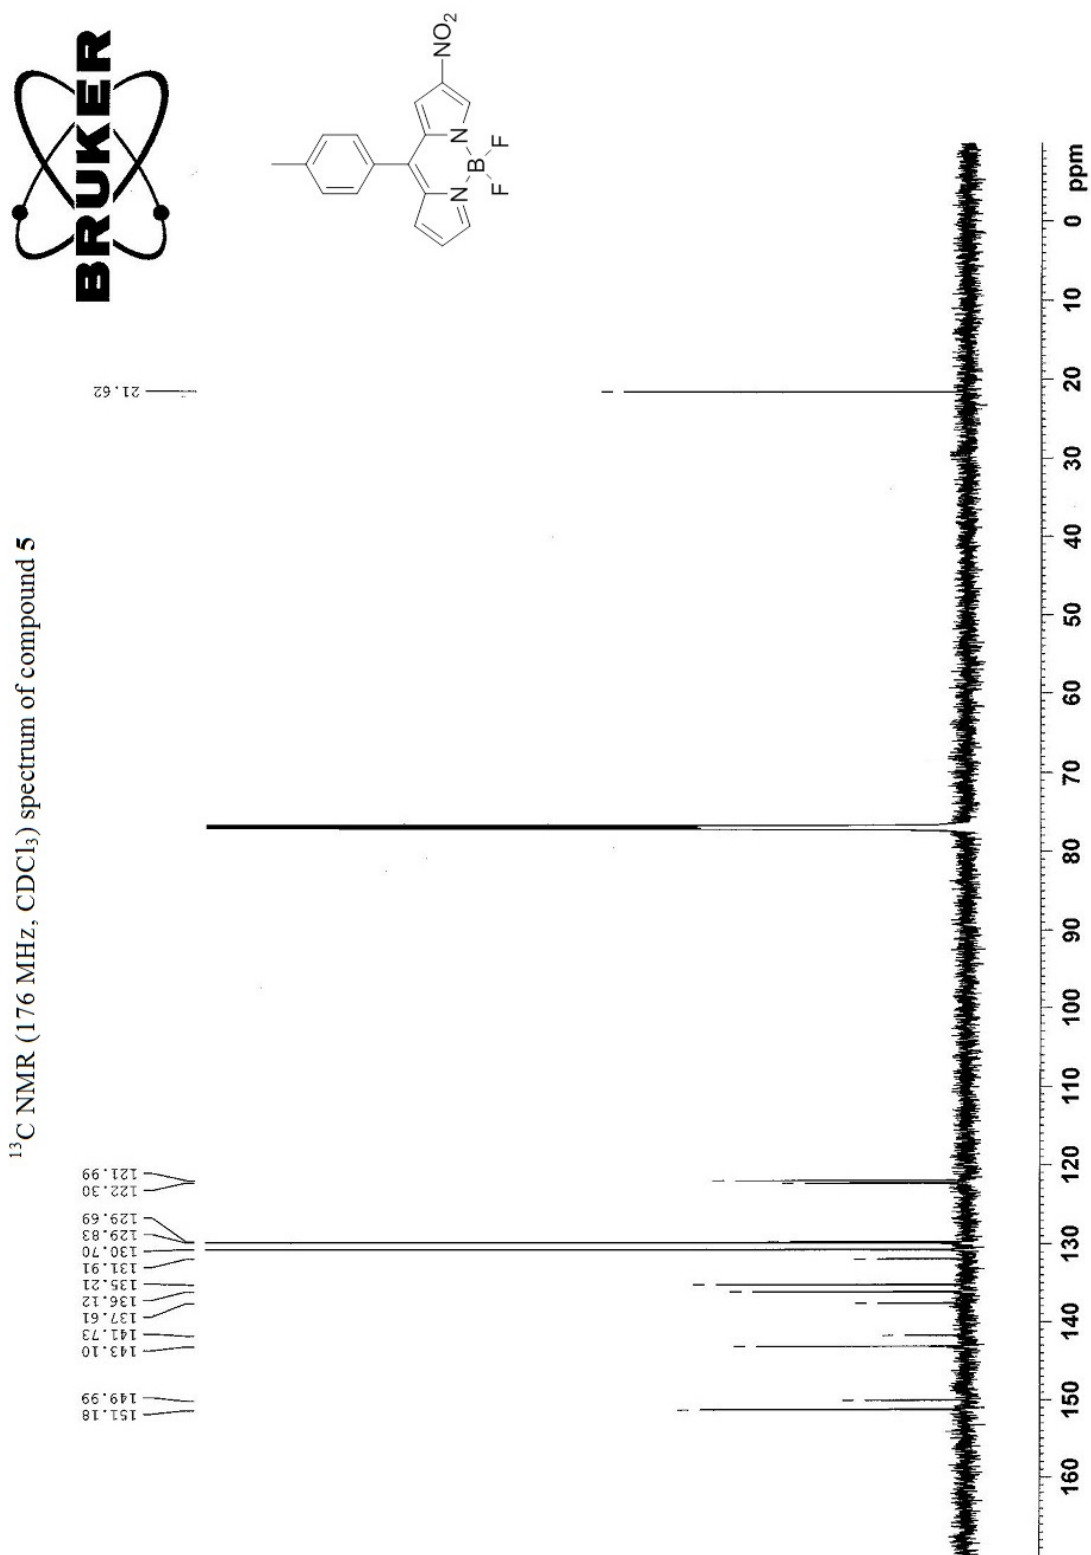



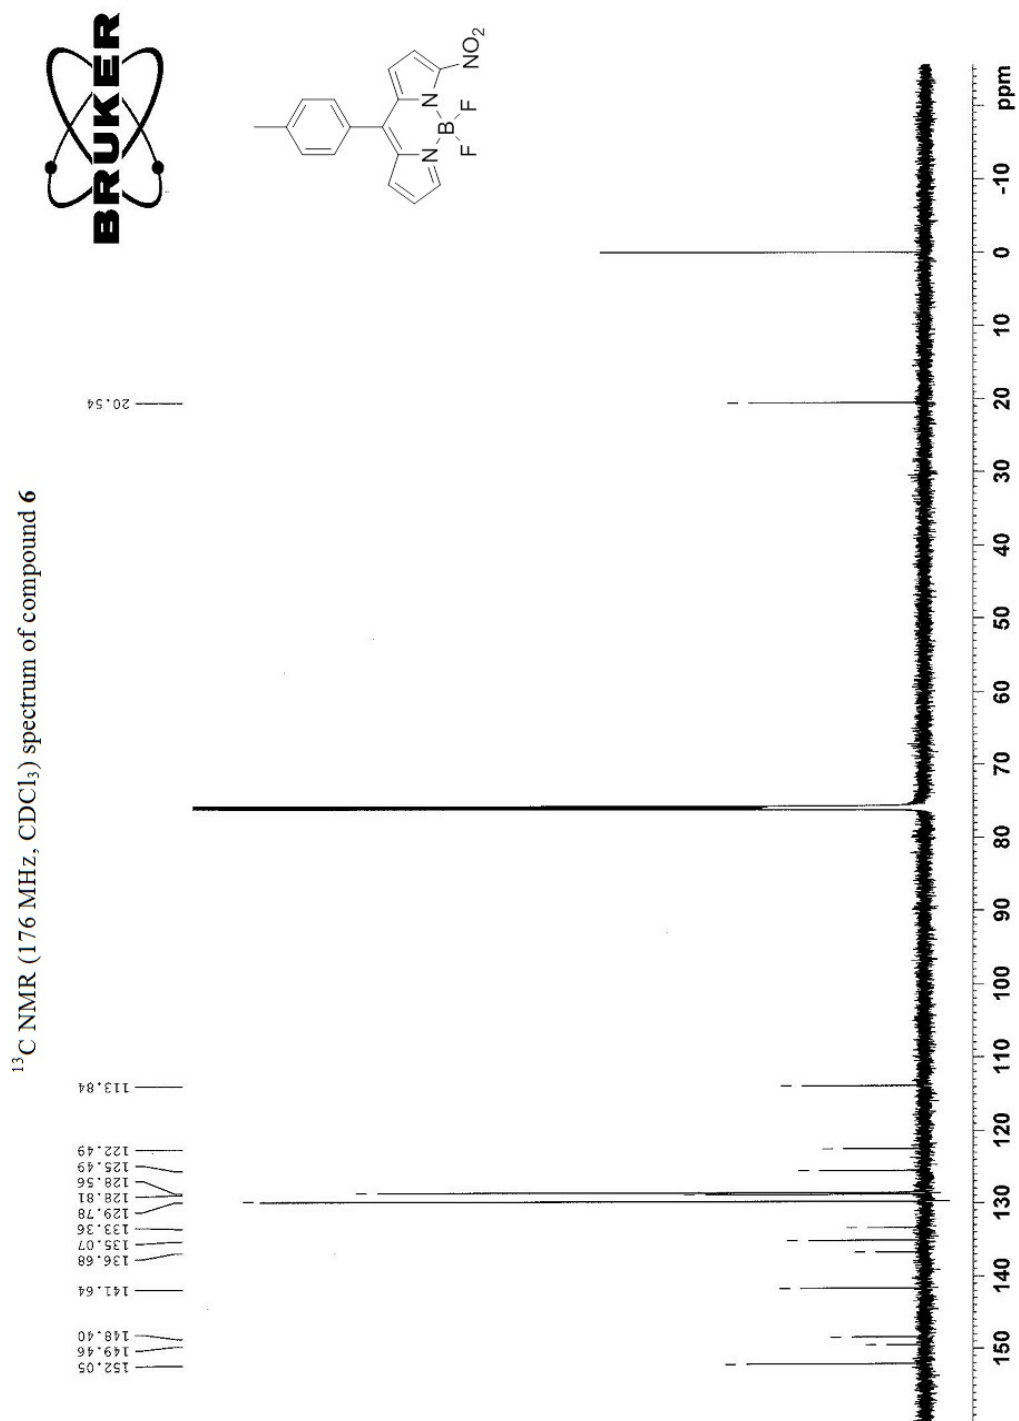

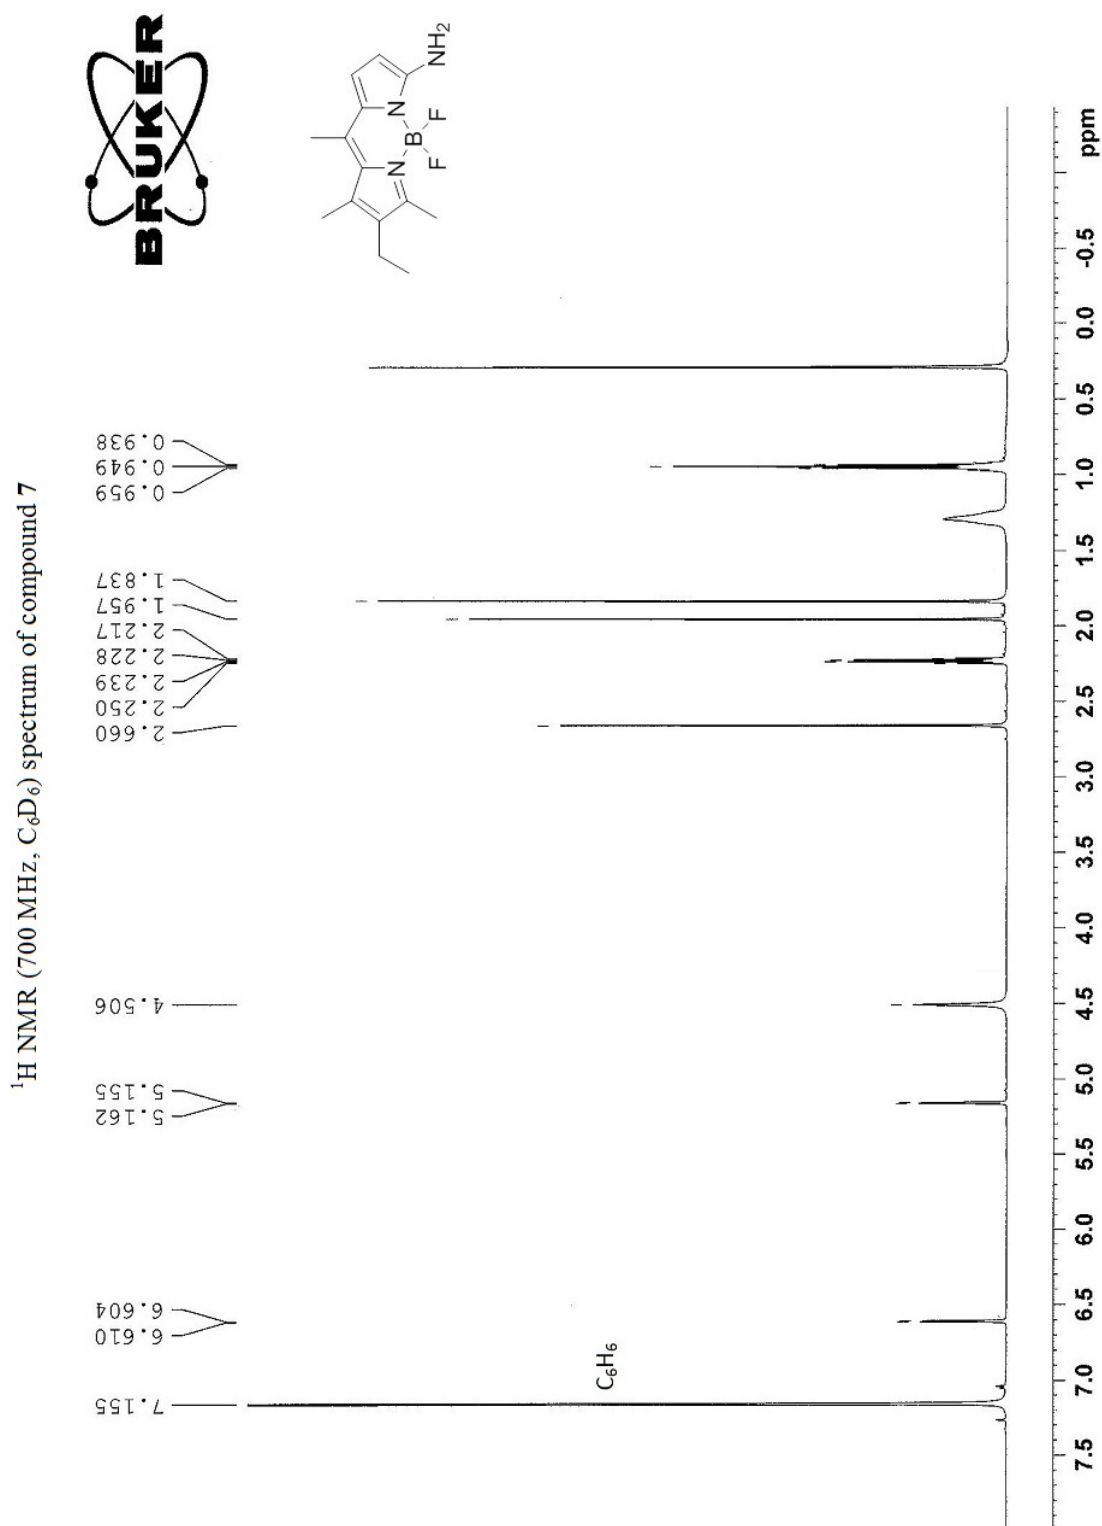

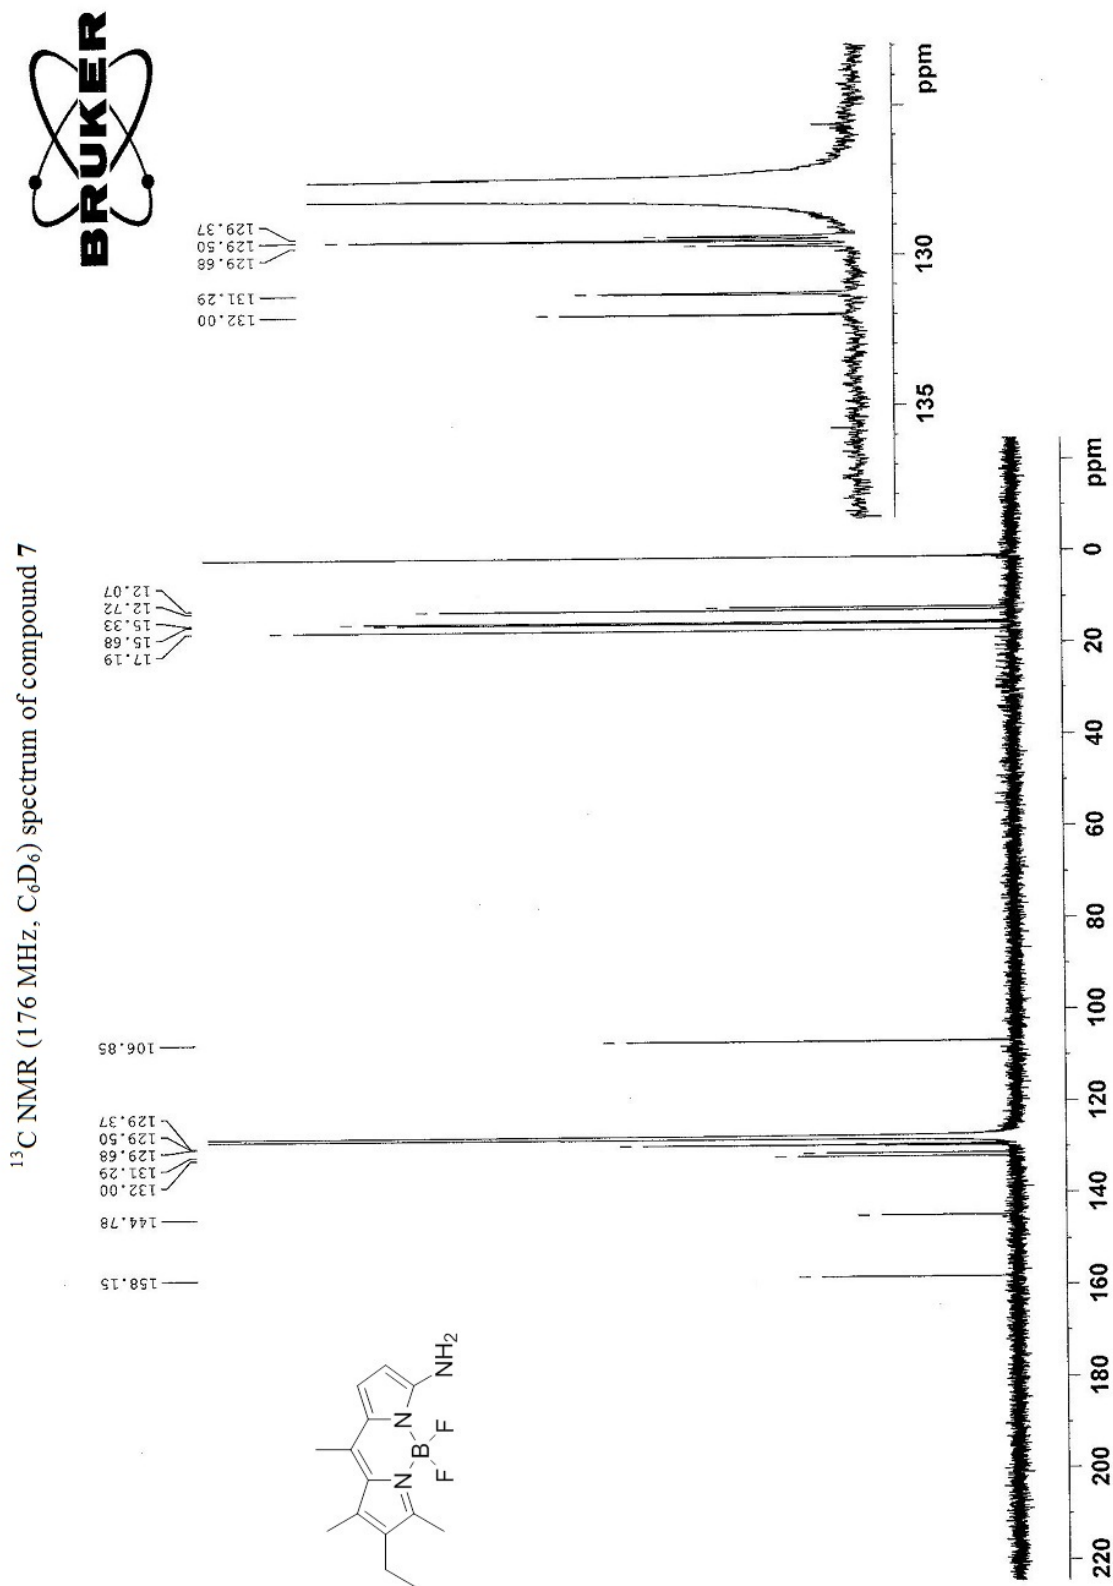





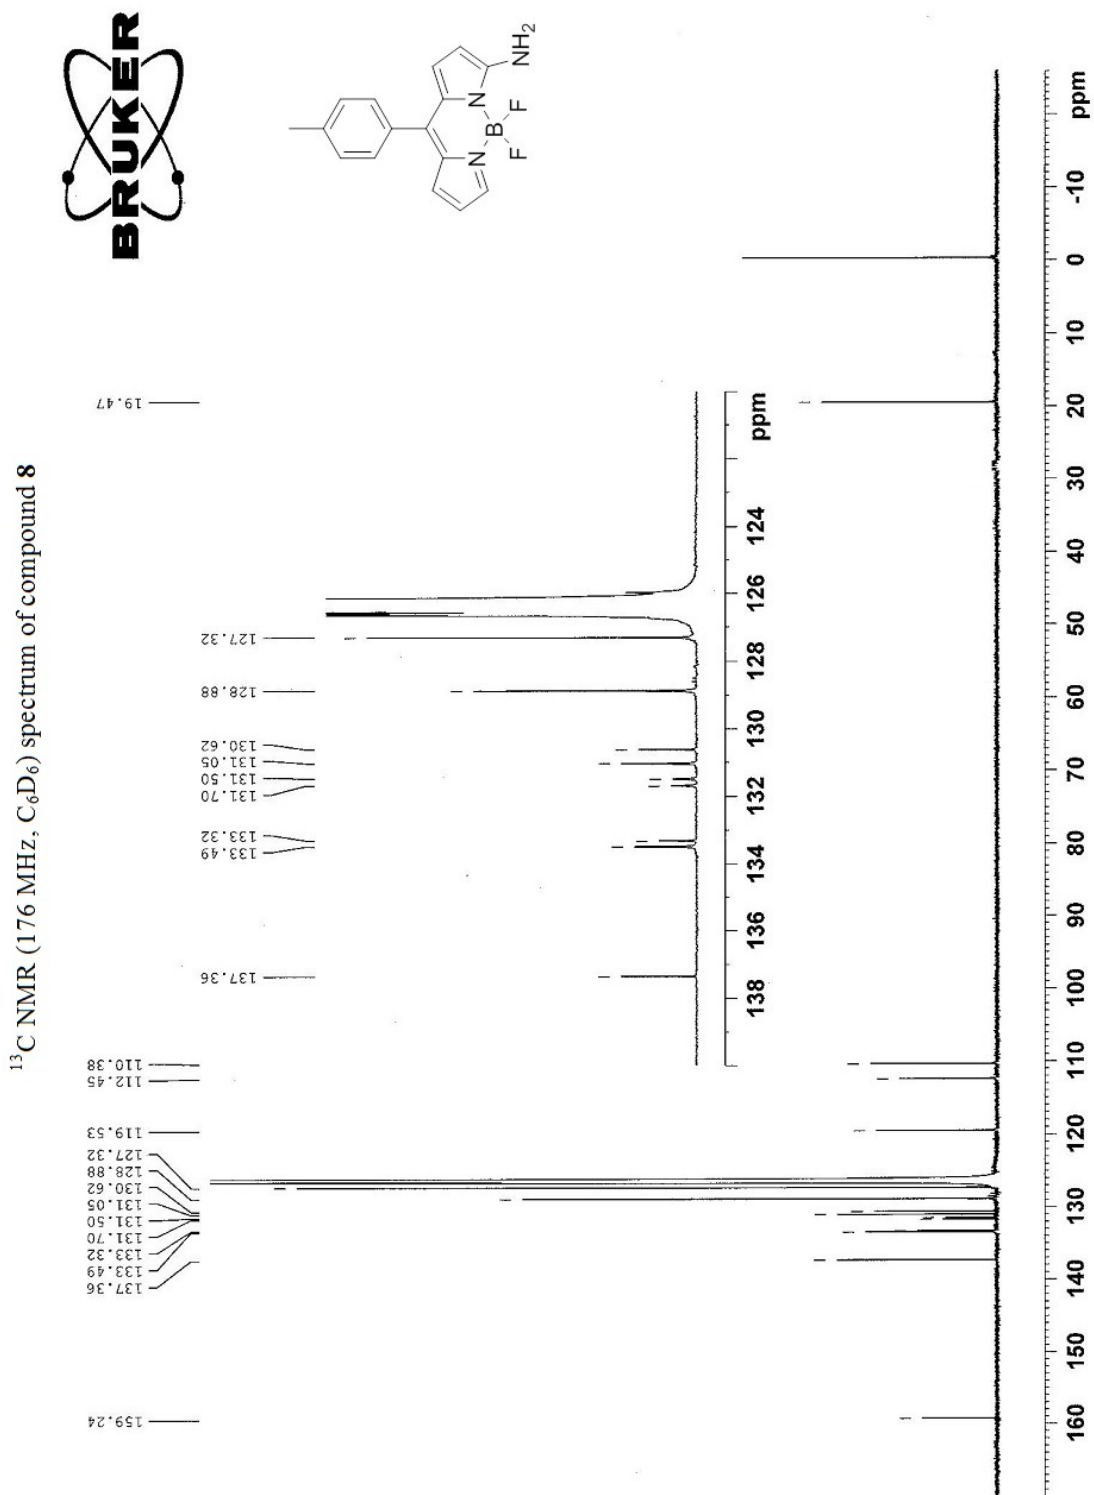

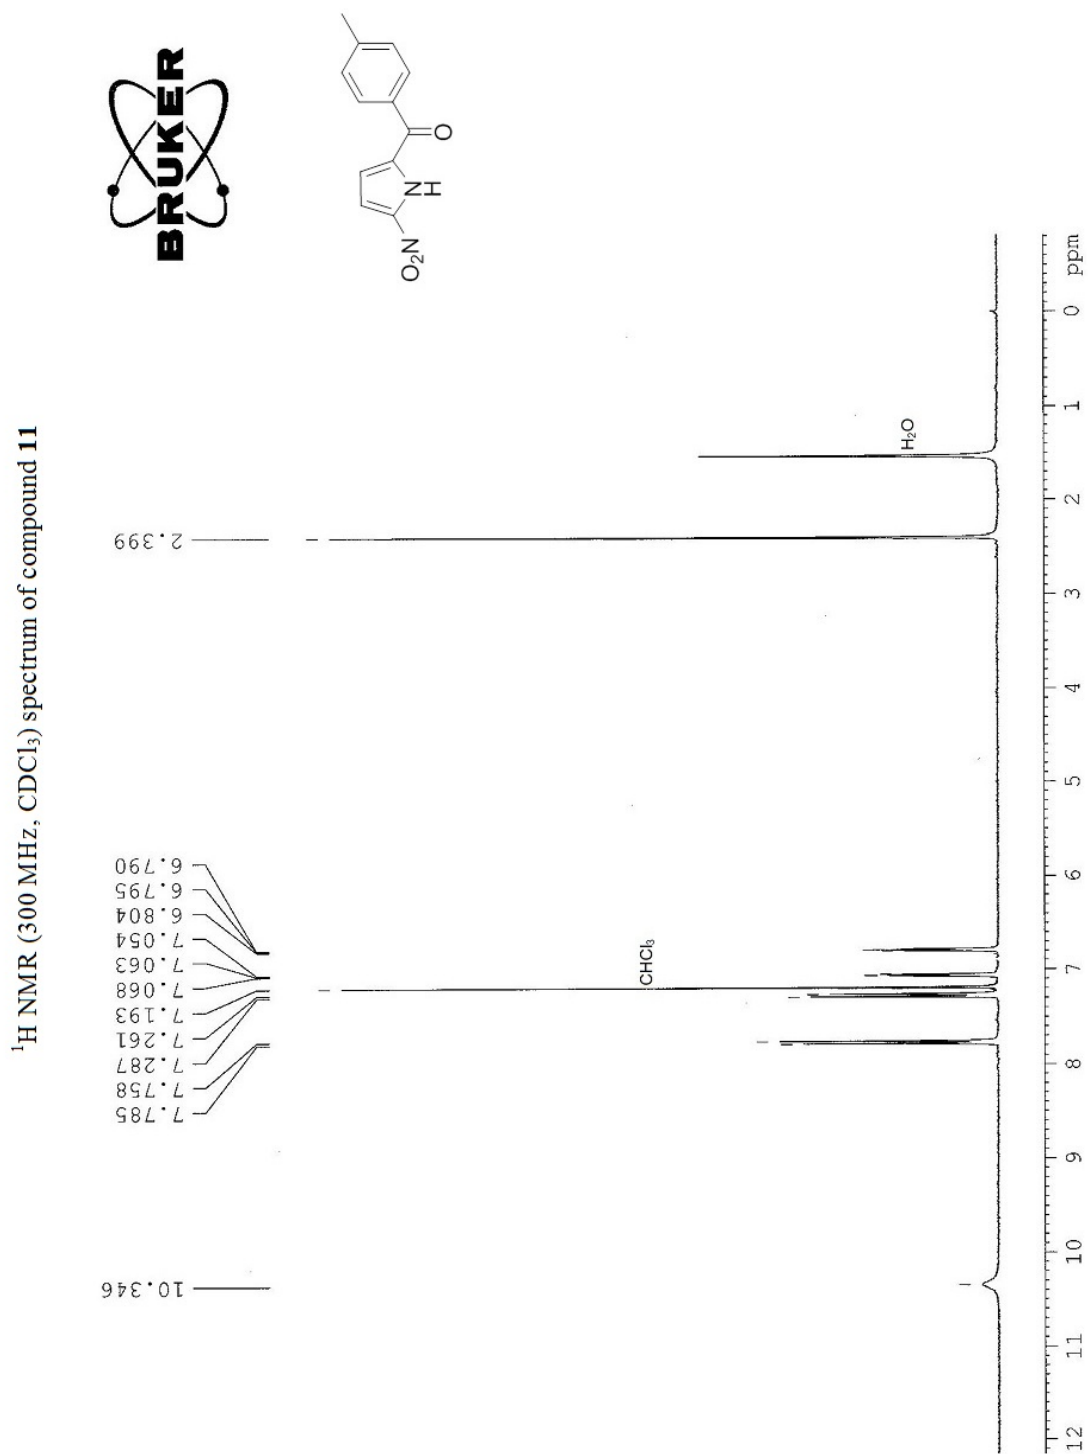

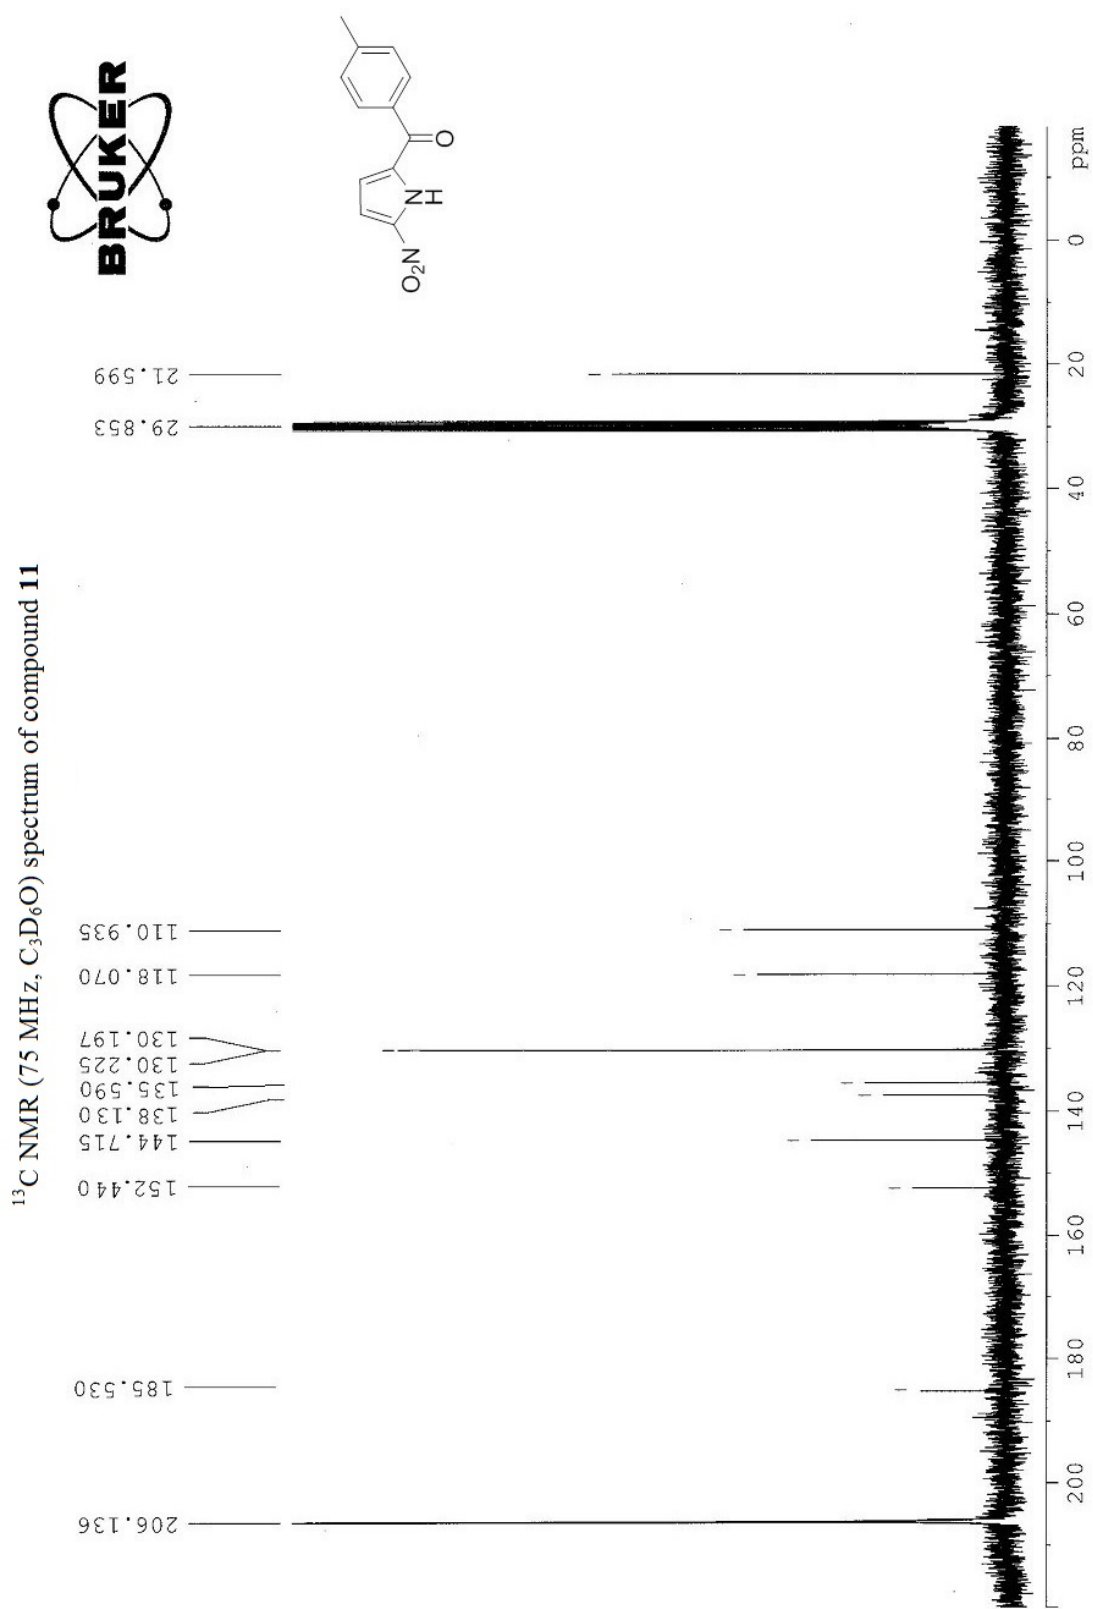



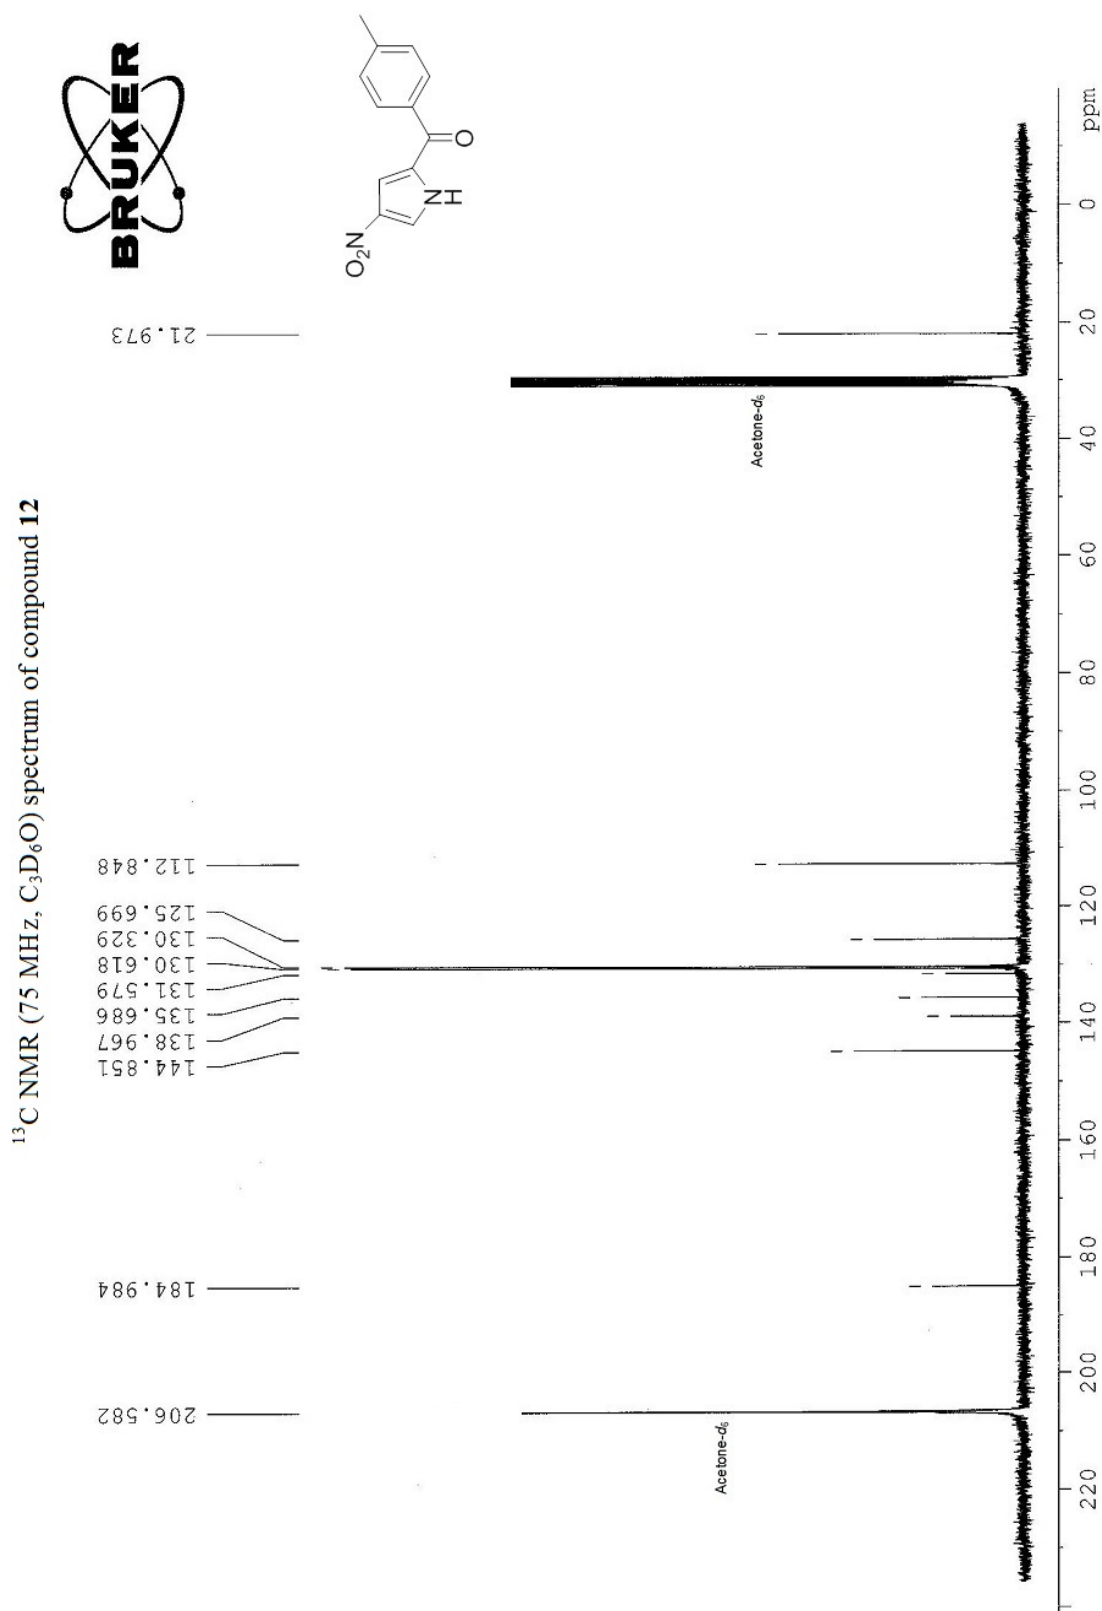

**Table S1.** Photophysical properties of compound **1** and its amino derivative **7** in different media ranking from apolar, to polar and polar/protic solvents; absorption ( $\lambda_{ab}$ ) and emission ( $\lambda_{fl}$ ) wavelength at the maximum, molar absorption ( $\epsilon_{max}$ ), fluorescence quantum yield ( $\phi$ ) and lifetime ( $\tau$ ), radiative ( $k_{fl}$ ) and non-radiative rate constants ( $k_{nr}$ ), and Stokes shift ( $\Delta\nu_{St}$ ).

|                         | $\lambda_{ab}$<br>(nm) | $\epsilon_{max}$<br>( $M^{-1}cm^{-1}$ ) | $\lambda_{fl}$<br>(nm) | $\phi$ | $\tau$<br>(ns) | $k_{fl}$<br>( $10^{-8}s^{-1}$ ) | $k_{nr}$<br>( $10^{-8}s^{-1}$ ) | $\Delta\nu_{St}$<br>( $cm^{-1}$ ) |
|-------------------------|------------------------|-----------------------------------------|------------------------|--------|----------------|---------------------------------|---------------------------------|-----------------------------------|
| <b>1</b>                |                        |                                         |                        |        |                |                                 |                                 |                                   |
| c-hexane                | 504.0                  | 33000                                   | 515.0                  | 0.96   | 5.46           | 1.75                            | 0.07                            | 760                               |
| ethyl acetate           | 496.0                  | 25000                                   | 512.5                  | 0.84   | 5.57           | 1.50                            | 0.28                            | 650                               |
| acetone                 | 495.0                  | 22000                                   | 512.5                  | 0.79   | 5.66           | 1.39                            | 0.37                            | 690                               |
| ethanol                 | 497.0                  | 25000                                   | 513.5                  | 0.84   | 5.73           | 1.46                            | 0.28                            | 630                               |
| methanol                | 495.5                  | 25000                                   | 512.5                  | 0.76   | 5.78           | 1.31                            | 0.41                            | 660                               |
| F <sub>3</sub> -ethanol | 492.0                  | 19000                                   | 511.0                  | 0.75   | 6.17           | 1.21                            | 0.40                            | 760                               |
| <b>7</b>                |                        |                                         |                        |        |                |                                 |                                 |                                   |
| c-hexane                | 522.0                  | 19000                                   | 538.0                  | 0.97   | 4.44           | 2.18                            | 0.07                            | 570                               |
| ethyl acetate           | 513.0                  | 13000                                   | 535.0                  | 0.79   | 4.21           | 1.87                            | 0.50                            | 800                               |
| acetone                 | 510.5                  | 12000                                   | 534.5                  | 0.77   | 4.30           | 1.80                            | 0.52                            | 910                               |
| ethanol                 | 512.0                  | 10000                                   | 535.0                  | 0.79   | 4.49           | 1.77                            | 0.46                            | 850                               |
| methanol                | 510.0                  | 9000                                    | 534.0                  | 0.74   | 4.54           | 1.62                            | 0.58                            | 880                               |
| F <sub>3</sub> -ethanol | 509.5                  | 5000                                    | 533.5                  | 0.69   | 5.63           | 1.23                            | 0.55                            | 885                               |

**Table S2.** Photophysical properties of the nitro derivatives **3** and **4** in different media; absorption ( $\lambda_{ab}$ ) and emission ( $\lambda_{fl}$ ) wavelength at the maximum, molar absorption ( $\epsilon_{max}$ ), fluorescence quantum yield ( $\phi$ ) and lifetime ( $\tau$ ), radiative ( $k_{fl}$ ) and non-radiative rate constants ( $k_{nr}$ ).

|                         | $\lambda_{ab}$<br>(nm) | $\epsilon_{max}$<br>(M <sup>-1</sup> cm <sup>-1</sup> ) | $\lambda_{fl}$<br>(nm) | $\phi$ | $\tau$<br>(ns)          | $k_{fl}$<br>(10 <sup>-8</sup> s <sup>-1</sup> ) | $k_{nr}$<br>(10 <sup>-8</sup> s <sup>-1</sup> ) |
|-------------------------|------------------------|---------------------------------------------------------|------------------------|--------|-------------------------|-------------------------------------------------|-------------------------------------------------|
| <b>3</b>                |                        |                                                         |                        |        |                         |                                                 |                                                 |
| c-hexane                | 458.0<br>476.0         | 24000                                                   | 509.0<br>530.0         | 0.53   | 3.13                    | 1.70                                            | 1.49                                            |
| Diethyl ether           | 452.0                  | 21000                                                   | 508.0<br>526.5         | 0.20   | 2.96                    | 0.68                                            | 2.69                                            |
| THF                     | 451.5                  | 21000                                                   | 509.0<br>527.5         | 0.18   | 2.56                    | 0.69                                            | 3.22                                            |
| dioxane                 | 456.5                  | 22000                                                   | 509.0<br>531.5         | 0.29   | 3.28                    | 0.88                                            | 2.16                                            |
| ethyl acetate           | 450.0                  | 21000                                                   | 507.5<br>526.0         | 0.33   | 2.56                    | 1.27                                            | 2.63                                            |
| acetone                 | 446.5                  | 15000                                                   | 509.0<br>522.5         | 0.19   | 2.01                    | 0.96                                            | 4.02                                            |
| ethanol                 | 449.0                  | 21000                                                   | 509.5<br>527.0         | 0.24   | 2.07                    | 1.16                                            | 3.67                                            |
| methanol                | 446.5                  | 21000                                                   | 509.5<br>526.5         | 0.17   | 1.54                    | 1.10                                            | 5.39                                            |
| F <sub>3</sub> -ethanol | 440.5                  | 20000                                                   | 510.0<br>527.5         | 0.02   | 0.19                    | 0.89                                            | 51.74                                           |
| <b>4</b>                |                        |                                                         |                        |        |                         |                                                 |                                                 |
| c-hexane                | 474.0                  | 25000                                                   | 530.5<br>556.0         | 0.174  | 1.53                    | 1.11                                            | 5.42                                            |
| Diethyl ether           | 466.0                  | 27000                                                   | 532.5<br>555.0         | 0.019  | 0.47 (95%)<br>3.55 (5%) | -                                               | -                                               |
| THF                     | 468.0                  | 24000                                                   | 533.5<br>560.5         | 0.012  | 0.25 (91%)<br>3.03 (9%) | -                                               | -                                               |
| dioxane                 | 470.0                  | 26000                                                   | 536.0<br>564.5         | 0.023  | 0.44 (92%)<br>3.40 (8%) | -                                               | -                                               |
| ethyl acetate           | 465.5                  | 21000                                                   | 533.0<br>558.0         | 0.023  | 0.27 (94%)<br>3.07 (6%) | -                                               | -                                               |
| acetone                 | 461.5                  | 17000                                                   | 531.0                  | 0.009  | 0.12 (92%)<br>2.05 (8%) | -                                               | -                                               |
| ethanol                 | 465.0                  | 19000                                                   | 530.5                  | 0.009  | 0.09 (93%)<br>2.00 (7%) | -                                               | -                                               |
| methanol                | 462.5                  | 20000                                                   | 530.5                  | 0.005  | 0.05 (91%)<br>1.73 (9%) | -                                               | -                                               |
| F <sub>3</sub> -ethanol | 458.5                  | 19000                                                   | 506.5                  | 0.004  | -                       | -                                               | -                                               |



**Table S3.** Photophysical properties of the reference compound **2** and its amino (**8**) and nitro (**6**) derivatives in different media; absorption ( $\lambda_{ab}$ ) and emission ( $\lambda_{fl}$ ) wavelength at the maximum, molar absorption ( $\epsilon_{max}$ ), fluorescence quantum yield ( $\phi$ ) and lifetime ( $\tau$ ), radiative ( $k_{fl}$ ) and non-radiative rate constants ( $k_{nr}$ ).

|                         | $\lambda_{ab}$<br>(nm) | $\epsilon_{max}$<br>( $M^{-1}cm^{-1}$ ) | $\lambda_{fl}$<br>(nm) | $\phi$ | $\tau$<br>(ps) | $k_{fl}$<br>( $10^{-8}s^{-1}$ ) | $k_{nr}$<br>( $10^{-8}s^{-1}$ ) |
|-------------------------|------------------------|-----------------------------------------|------------------------|--------|----------------|---------------------------------|---------------------------------|
| <b>2</b>                |                        |                                         |                        |        |                |                                 |                                 |
| c-hexane                | 500.5                  | 69000                                   | 516.0                  | 0.036  | 340            | 1.05                            | 28.3                            |
| ethyl acetate           | 497.0                  | 62000                                   | 514.5                  | 0.024  | 237            | 1.01                            | 41.2                            |
| acetone                 | 496.5                  | 61000                                   | 514.5                  | 0.018  | 196            | 0.92                            | 50.1                            |
| ethanol                 | 497.5                  | 62000                                   | 514.5                  | 0.025  | 253            | 0.99                            | 38.5                            |
| methanol                | 496.0                  | 61000                                   | 513.5                  | 0.018  | 197            | 0.91                            | 49.8                            |
| F <sub>3</sub> -ethanol | 493.0                  | 56000                                   | 509.5                  | 0.031  | 323            | 0.96                            | 30.0                            |
| <b>8</b>                |                        |                                         |                        |        |                |                                 |                                 |
| c-hexane                | 472.5<br>499.0         | 48000                                   | 515.5                  | 0.017  | 88             | 1.93                            | 110.5                           |
| Diethyl ether           | 462.0<br>481.0         | 32000                                   | 514.0                  | 0.014  | 76             | 1.84                            | 129.4                           |
| THF                     | 463.0<br>477.5         | 30000                                   | 517.5                  | 0.018  | 88             | 2.04                            | 111.6                           |
| dioxane                 | 466.0<br>484.0         | 31000                                   | 519.0                  | 0.029  | 153            | 1.89                            | 63.4                            |
| ethyl acetate           | 462.0<br>474.5         | 30000                                   | 517.5                  | 0.017  | 78             | 2.18                            | 126.0                           |
| acetone                 | 460.0                  | 29000                                   | 517.0                  | 0.012  | 64             | 1.72                            | 154.5                           |
| ethanol                 | 458.0                  | 30000                                   | 514.5                  | 0.017  | 91             | 1.87                            | 108.0                           |
| methanol                | 456.0                  | 29000                                   | 515.0                  | 0.013  | 66             | 1.82                            | 149.7                           |
| F <sub>3</sub> -ethanol | 451.5                  | 26000                                   | 512.5                  | 0.023  | 140            | 1.64                            | 69.8                            |
| <b>6</b>                |                        |                                         |                        |        |                |                                 |                                 |
| c-hexane                | 485.0<br>509.0         | 39000                                   | 519.0                  | 0.131  | 1020           | 1.29                            | 8.5                             |
| Diethyl ether           | 480.0<br>506.0         | 33000                                   | 521.0                  | 0.100  | 930            | 1.08                            | 9.7                             |
| THF                     | 482.0<br>508.0         | 30000                                   | 528.0                  | 0.144  | 1250           | 1.15                            | 6.9                             |
| dioxane                 | 475.0<br>509.0         | 19000                                   | 531.5                  | 0.203  | 1935           | 1.05                            | 4.1                             |
| ethyl acetate           | 483.0<br>505.0         | 23000                                   | 524.0                  | 0.116  | 1197           | 0.97                            | 7.4                             |
| acetone                 | 481.0<br>505.5         | 21000                                   | 526.0                  | 0.109  | 1060           | 1.02                            | 8.4                             |
| ethanol                 | 488.5<br>507.0         | 26000                                   | 524.0                  | 0.089  | 1150           | 0.77                            | 7.9                             |
| methanol                | 505.5                  | 26000                                   | 525.5                  | 0.038  | 530            | 0.72                            | 18.1                            |
| F <sub>3</sub> -ethanol | 481.0<br>504.0         | 26000                                   | 525.0                  | 0.035  | 480            | 0.74                            | 20.2                            |

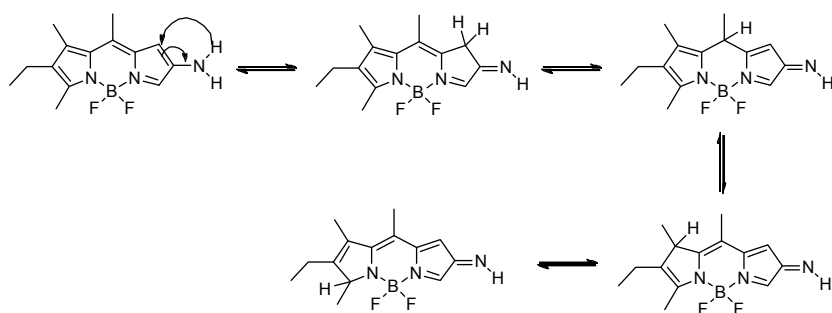

**Scheme S1.** Enamine-imine tautomeric equilibrium upon substitution by amine at position 6 (compound **9**).

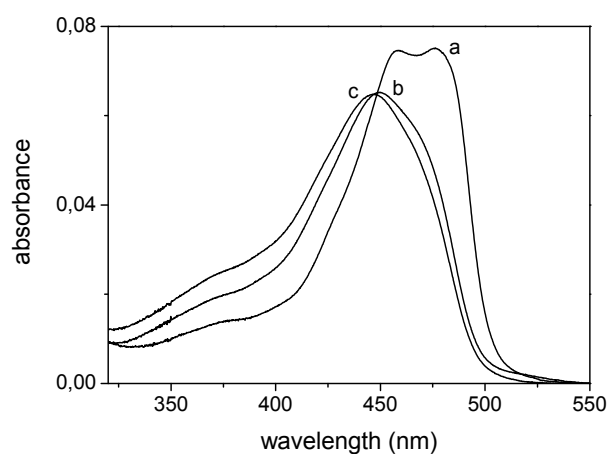

**Figure S1.** Absorption spectra of compound **3** in cyclohexane (a), acetone (b) and methanol (c).

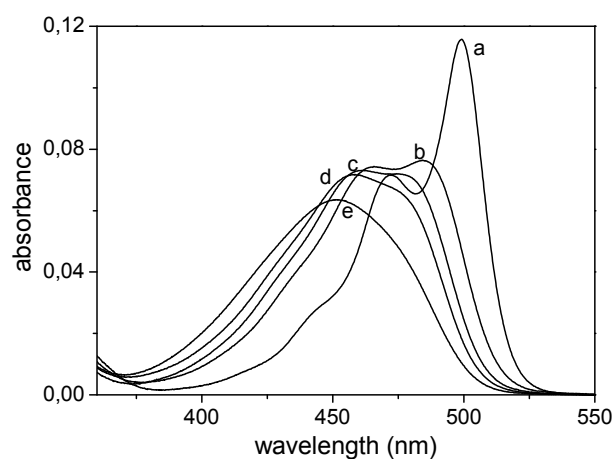

**Figure S2.** Absorption spectra of compound **6** in cyclohexane (a), dioxane (b), ethyl acetate (c), ethanol (d) and trifluoroethanol (e).
